# Supplementary material for: Long sleep duration is associated with abdominal aortic calcification among male adults with chronic kidney disease: NHANES 2013–2014
Source: PubMed Central journal article supplement — Sci Rep. 2024 Sep 27;14:22076. doi: 10.1038/s41598-024-72879-x (PMC11436971; doi:10.1038/s41598-024-72879-x), 2024-09-27
Supplement: 41598_2024_72879_MOESM1_ESM.pdf [file 41598_2024_72879_MOESM1_ESM.pdf]

**Supplementary Table 1. Questionnaire items**

| Characteristics                                                                                                                                                          | Mean ± SD       |
|--------------------------------------------------------------------------------------------------------------------------------------------------------------------------|-----------------|
| How much sleep do you usually get at night on weekdays or workdays?                                                                                                      | 6.88 ± 1.41     |
| How much time do you usually spend sitting on a typical day (min) ?                                                                                                      | 410.82 ± 190.59 |
|                                                                                                                                                                          | n (%)           |
| Have you smoked at least 100 cigarettes in your entire life?                                                                                                             |                 |
| <i>Yes</i>                                                                                                                                                               | 1379 (46.03)    |
| <i>No</i>                                                                                                                                                                | 1615 (53.91)    |
| <i>Refused / Don't know / Missing</i>                                                                                                                                    | 2 (0.07)        |
| In any one year, have you had at least 12 drinks of any type of alcoholic beverage?                                                                                      |                 |
| <i>Yes</i>                                                                                                                                                               | 2018 (67.36)    |
| <i>No</i>                                                                                                                                                                | 803 (26.80)     |
| <i>Refused / Don't know / Missing</i>                                                                                                                                    | 175 (5.84)      |
| Have you ever been told by a doctor or other health professional that you had hypertension, also called high blood pressure?                                             |                 |
| <i>Yes</i>                                                                                                                                                               | 1412 (47.13)    |
| <i>No</i>                                                                                                                                                                | 1581 (52.77)    |
| <i>Refused / Don't know / Missing</i>                                                                                                                                    | 3 (0.10)        |
| Other than during pregnancy, have you ever been told by a doctor or health professional that you have diabetes or sugar diabetes?                                        |                 |
| <i>Yes</i>                                                                                                                                                               | 487 (16.26)     |
| <i>No / Borderline</i>                                                                                                                                                   | 2508 (83.71)    |
| <i>Refused / Don't know / Missing</i>                                                                                                                                    | 1 (0.03)        |
| Has a doctor or other health professional ever told you that you had congestive heart failure / coronary heart disease / angina/angina pectoris / heart attack / stroke? |                 |
| <i>Yes</i>                                                                                                                                                               | 380 (12.68)     |
| <i>No</i>                                                                                                                                                                | 2605 (86.95)    |
| <i>Refused / Don't know / Missing</i>                                                                                                                                    | 11 (0.37)       |

**Supplementary Table 2. eGFR category in CKD participants**

| eGFR Category                           | n (%)           |                |                  |
|-----------------------------------------|-----------------|----------------|------------------|
|                                         | Total (n = 630) | Male (n = 303) | Female (n = 327) |
| eGFR <30 (ml/min/1.73m <sup>2</sup> )   | 31 (4.9)        | 13 (4.3)       | 18 (5.5)         |
| 30≤eGFR<45 (ml/min/1.73m <sup>2</sup> ) | 95 (15.1)       | 49 (16.2)      | 46 (14.1)        |
| 45≤eGFR<60 (ml/min/1.73m <sup>2</sup> ) | 208 (33.0)      | 109 (36)       | 99 (30.3)        |
| 60≤eGFR<90 (ml/min/1.73m <sup>2</sup> ) | 160 (25.4)      | 77 (25.4)      | 83 (25.4)        |
| eGFR ≥90 (ml/min/1.73m <sup>2</sup> )   | 136 (21.6)      | 55 (18.2)      | 81 (24.8)        |

Abbreviations: eGFR, estimated glomerular filtration rate; CKD, chronic kidney disease.

**Supplementary Table 3. The association between sleep duration and AAC-score in CKD participants in different eGFR subgroups**

| Subgroups                                       | Total<br>β (95%CI)  | P-value | P for interaction | Male<br>β (95%CI)   | P-value | P for interaction | Female<br>β (95%CI) | P-value | P for interaction |
|-------------------------------------------------|---------------------|---------|-------------------|---------------------|---------|-------------------|---------------------|---------|-------------------|
|                                                 |                     |         | 0.255             |                     |         | 0.916             |                     |         | 0.203             |
| <b>eGFR &lt;30 (ml/min/1.73m<sup>2</sup>)</b>   |                     |         |                   |                     |         |                   |                     |         |                   |
| 2-5 h                                           | -0.28 (-8.75, 8.19) | 0.95    |                   | 8.21 (NaN, NaN)     | NaN     |                   | -2.05 (NaN, NaN)    | NaN     |                   |
| 6-8 h                                           | Reference           |         |                   | Reference           |         |                   | Reference           |         |                   |
| ≥9 h                                            | 1.07 (-5.09, 7.22)  | 0.745   |                   | -3.44 (NaN, NaN)    | NaN     |                   | -18.31 (NaN, NaN)   | NaN     |                   |
| <b>30≤eGFR&lt;45 (ml/min/1.73m<sup>2</sup>)</b> |                     |         |                   |                     |         |                   |                     |         |                   |
| 2-5 h                                           | 1.47 (-2.62, 5.57)  | 0.482   |                   | -3.03 (-10.77, 4.7) | 0.45    |                   | 7.35 (-0.33, 15.03) | 0.074   |                   |
| 6-8 h                                           | Reference           |         |                   | Reference           |         |                   | Reference           |         |                   |
| ≥9 h                                            | 1.14 (-1.86~4.14)   | 0.459   |                   | 1.26 (-4.54, 7.06)  | 0.674   |                   | 1.27 (-4.25, 6.79)  | 0.656   |                   |
| <b>45≤eGFR&lt;60 (ml/min/1.73m<sup>2</sup>)</b> |                     |         |                   |                     |         |                   |                     |         |                   |
| 2-5 h                                           | -0.23 (-2.38, 1.91) | 0.831   |                   | -0.44 (-3.48, 2.61) | 0.778   |                   | 0.97 (-2.47, 4.41)  | 0.581   |                   |
| 6-8 h                                           | Reference           |         |                   | Reference           |         |                   | Reference           |         |                   |
| ≥9 h                                            | 1.08 (-1.02, 3.19)  | 0.316   |                   | 1.75 (-0.75, 4.25)  | 0.173   |                   | 0.10 (-3.93, 4.13)  | 0.961   |                   |
| <b>60≤eGFR&lt;90 (ml/min/1.73m<sup>2</sup>)</b> |                     |         |                   |                     |         |                   |                     |         |                   |
| 2-5 h                                           | -0.60 (-2.34, 1.14) | 0.5     |                   | -2.54 (-5.23, 0.15) | 0.07    |                   | 0.75 (-1.84, 3.34)  | 0.574   |                   |
| 6-8 h                                           | Reference           |         |                   | Reference           |         |                   | Reference           |         |                   |
| ≥9 h                                            | 0.30 (-1.92, 2.52)  | 0.789   |                   | 1.17 (-2.66, 5.01)  | 0.552   |                   | -0.60 (-3.97, 2.77) | 0.729   |                   |
| <b>eGFR ≥90 (ml/min/1.73m<sup>2</sup>)</b>      |                     |         |                   |                     |         |                   |                     |         |                   |
| 2-5 h                                           | 0.17 (-1.43, 1.77)  | 0.836   |                   | 1.38 (-1.66, 4.41)  | 0.381   |                   | 0.36 (-1.88, 2.59)  | 0.756   |                   |
| 6-8 h                                           | Reference           |         |                   | Reference           |         |                   | Reference           |         |                   |
| ≥9 h                                            | -1.19 (-3.59, 1.21) | 0.334   |                   | 0.60 (-3.21, 4.41)  | 0.76    |                   | -2.97 (-6.62, 0.68) | 0.116   |                   |

Abbreviations: AAC, abdominal aortic calcification; eGFR, estimated glomerular filtration rate; CKD, chronic kidney disease; OR, odds ratio; 95% CI, 95% confidence interval.

All subgroups were adjusted for age, gender, race, body mass index, poverty-income ratio, education level, smoking history, alcohol drinking, hypertension, diabetes, cardiovascular diseases, sedentary time, total cholesterol, high-density lipoprotein cholesterol, serum total calcium, serum phosphorus, serum total 25-hydroxyvitamin D, and neutrophil-to-lymphocyte ratio, except the stratification factor itself.

**Supplementary Table 4. The association between sleep duration and SAAC in CKD participants in different eGFR subgroups**

| Subgroups                               | Total<br>OR (95% CI)     | P-value | P for interaction | Male<br>OR (95% CI)           | P-value | P for interaction | Female<br>OR (95% CI)          | P-value | P for interaction |
|-----------------------------------------|--------------------------|---------|-------------------|-------------------------------|---------|-------------------|--------------------------------|---------|-------------------|
|                                         |                          |         | 0.69              |                               |         | 0.872             |                                |         | 0.366             |
| eGFR <30 (ml/min/1.73m <sup>2</sup> )   |                          |         |                   |                               |         |                   |                                |         |                   |
| 2-5 h                                   | 601646819059.05 (0, Inf) | 1       |                   | 2.17678993024525e+21 (0, Inf) | 1       |                   | 0 (0, Inf)                     | 1       |                   |
| 6-8 h                                   | Reference                |         |                   | Reference                     |         |                   | Reference                      |         |                   |
| ≥9 h                                    | 0 (0, Inf)               | 1       |                   | 1 (0, Inf)                    | 1       |                   | 0 (0, Inf)                     | 1       |                   |
| 30≤eGFR<45 (ml/min/1.73m <sup>2</sup> ) |                          |         |                   |                               |         |                   |                                |         |                   |
| 2-5 h                                   | 1.19 (0.16~8.84)         | 0.867   |                   | 0 (0, Inf)                    | 0.999   |                   | 23133.82 (0, 1099880327507.19) | 0.265   |                   |
| 6-8 h                                   | Reference                |         |                   | Reference                     |         |                   | Reference                      |         |                   |
| ≥9 h                                    | 1.28 (0.28~5.92)         | 0.755   |                   | 2.91854489052421e+55 (0, Inf) | 0.999   |                   | 0.16 (0, 68824.82)             | 0.783   |                   |
| 45≤eGFR<60 (ml/min/1.73m <sup>2</sup> ) |                          |         |                   |                               |         |                   |                                |         |                   |
| 2-5 h                                   | 0.78 (0.16, 3.9)         | 0.761   |                   | 4.12 (0.2, 86.49)             | 0.362   |                   | 1.91 (0.15, 24.37)             | 0.619   |                   |
| 6-8 h                                   | Reference                |         |                   | Reference                     |         |                   | Reference                      |         |                   |
| ≥9 h                                    | 1.44 (0.47, 4.43)        | 0.522   |                   | 2.46 (0.4, 14.96)             | 0.329   |                   | 2.01 (0.23, 17.69)             | 0.531   |                   |
| 60≤eGFR<90 (ml/min/1.73m <sup>2</sup> ) |                          |         |                   |                               |         |                   |                                |         |                   |
| 2-5 h                                   | 1.56 (0.15, 16.04)       | 0.707   |                   | 0 (0, Inf)                    | 0.999   |                   | 5.62 (0.13, 234.4)             | 0.365   |                   |
| 6-8 h                                   | Reference                |         |                   | Reference                     |         |                   | Reference                      |         |                   |
| ≥9 h                                    | 0.97 (0.1, 9.2)          | 0.981   |                   | 2.79547164495911e+25 (0, Inf) | 0.999   |                   | 0.87 (0.01, 72.27)             | 0.951   |                   |
| eGFR ≥90 (ml/min/1.73m <sup>2</sup> )   |                          |         |                   |                               |         |                   |                                |         |                   |
| 2-5 h                                   | 1.71 (0.27, 10.89)       | 0.571   |                   | 336600132.33 (0, Inf)         | 1       |                   | 2869272057648.02 (0, Inf)      | 1       |                   |
| 6-8 h                                   | Reference                |         |                   | Reference                     |         |                   | Reference                      |         |                   |
| ≥9 h                                    | 0.63 (0.05, 7.51)        | 0.712   |                   | 1.81659892794047e+21 (0, Inf) | 1       |                   | 0 (0, Inf)                     | 1       |                   |

Abbreviations: SAAC, severe abdominal aortic calcification; eGFR, estimated glomerular filtration rate; CKD, chronic kidney disease; OR, odds ratio; 95% CI, 95% confidence interval.

All subgroups were adjusted for age, gender, race, body mass index, poverty-income ratio, education level, smoking history, alcohol drinking, hypertension, diabetes, cardiovascular diseases, sedentary time, total cholesterol, high-density lipoprotein cholesterol, serum total calcium, serum phosphorus, serum total 25-hydroxyvitamin D, and NLR, except the stratification factor itself.
